# Supplementary material for: The intracellular proteome of African swine fever virus
Source: PubMed Central journal article supplement (PMC6168524; doi:10.1038/s41598-018-32985-z), 2018-10-02

# The intracellular proteome of African swine fever virus

Catharina Keßler<sup>1</sup>, Jan Hendrik Forth<sup>2</sup>, Günther M. Keil<sup>1</sup>, Thomas C. Mettenleiter<sup>1</sup>,  
Sandra Blome<sup>3</sup>, Axel Karger<sup>1\*</sup>

<sup>1</sup> Institute of Molecular Virology and Cell Biology

<sup>2</sup> Institute of Infectology

<sup>3</sup> Institute of Diagnostic Virology

Friedrich-Loeffler-Institut, Federal Research Institute for Animal Health, Südufer 10, 17493 Greifswald-  
Insel Riems, Germany

\*Corresponding author:

Dr. Axel Karger, Institute of Molecular Virology and Cell Biology,  
Friedrich-Loeffler-Institut  
Federal Research Institute of Animal Health  
Südufer 10  
D-17493 Greifswald-Insel Riems/ Germany  
Phone: +49 383517-1247  
e-mail: axel.karger@fli.de

1 **Supplementary Table S3.** Summary of the MS results obtained for ASFV-specific proteins. The number of identified peptides (Pep), the sequence coverages  
2 (SC), and Mascot protein identification scores (Score) are given for every identified ASFV protein and for every cell line. Column 'Class' indicates structural (s),  
3 non-structural (ns), and so far uncharacterised (u) proteins and the current knowledge about the expression of the respective gene (O, predicted ORF; P,  
4 evidence for protein; R, evidence for mRNA). Proteins with an annotated function in column 'Description' which lack evidence for incorporation into the virions are  
5 listed as non-structural (ns). Data in this column was compiled from the Uniprot knowledgebase <sup>1</sup>, review articles <sup>2,3,4</sup>, and individual references given in column  
6 'Ref'.

7

| Accession  | Gene        | Description                              | WSL-HP |      |       | HEK 293 |      |       | Vero |      |       | Class | Ref              |
|------------|-------------|------------------------------------------|--------|------|-------|---------|------|-------|------|------|-------|-------|------------------|
|            |             |                                          | Pep    | SC   | Score | Pep     | SC   | Score | Pep  | SC   | Score |       |                  |
| CAN10352.1 | KP177R      | Structural protein P22                   | 22     | 71.2 | 1756  | 13      | 56.5 | 592   | 17   | 69.5 | 1095  | s P   | <sup>5,6</sup>   |
| CAN10354.1 | L60L        | pL60L                                    | 10     | 95.5 | 987   | 3       | 85.1 | 193   | 10   | 100  | 837   | u R   | <sup>7</sup>     |
| CAN10356.1 | MGF 110-1L  | MGF 110-1L                               | 6      | 23.3 | 324   | 11      | 31.1 | 465   | 16   | 48.5 | 778   | ns R  | <sup>8</sup>     |
| CAN10357.1 | MGF 110-2L  | MGF 110-2L                               | 5      | 52.9 | 346   | 0       | 0    | 0     | 2    | 17.3 | 67    | ns R  | <sup>8</sup>     |
| CAN10358.1 | MGF 110-4L  | XP124L. Multigene family 110 member      | 18     | 73.4 | 946   | 14      | 60.5 | 706   | 26   | 62.9 | 1452  | s P   | <sup>8,9</sup>   |
| CAN10359.1 | MGF 110-5L  | MGF 110-5L                               | 15     | 55.6 | 670   | 11      | 46   | 479   | 28   | 60.5 | 1398  | ns R  | <sup>8</sup>     |
| CAN10360.1 | 285L        | p285L                                    | 9      | 70.2 | 524   | 10      | 71.3 | 455   | 11   | 71.3 | 586   | u O   |                  |
| CAN10365.1 | MGF 110-14L | MGF 110-14L                              | 0      | 0    | 0     | 0       | 0    | 0     | 3    | 28.6 | 124   | ns R  | <sup>8</sup>     |
| CAN10379.1 | MGF 505-9R  | MGF 505-9R                               | 0      | 0    | 0     | 0       | 0    | 0     | 2    | 3.8  | 90    | ns R  | <sup>10,11</sup> |
| CAN10381.1 | A224L       | AP apoptosis inhibitor                   | 15     | 67.4 | 624   | 0       | 0    | 0     | 18   | 66.1 | 755   | ns P  | <sup>12</sup>    |
| CAN10382.1 | A104R       | Histone-like                             | 22     | 90.4 | 1738  | 14      | 90.4 | 801   | 17   | 90.4 | 1092  | s P   | <sup>13-15</sup> |
| CAN10383.1 | A240L       | Thymidylate kinase                       | 2      | 10   | 68    | 0       | 0    | 0     | 0    | 0    | 0     | ns R  | <sup>16</sup>    |
| CAN10385.1 | A151R       | pA151R                                   | 12     | 71.5 | 746   | 13      | 64.2 | 598   | 14   | 68.9 | 673   | s P   | <sup>17</sup>    |
| CAN10390.1 | A137R       | p11.5                                    | 44     | 98.5 | 3104  | 40      | 99.3 | 2338  | 42   | 99.3 | 2498  | s P   | <sup>18</sup>    |
| CAN10391.1 | F317L       | pF317L                                   | 15     | 38.2 | 565   | 5       | 19.6 | 147   | 10   | 36.3 | 381   | u O   |                  |
| CAN10392.1 | F334L       | Ribonucleotide reductase(small subunit)  | 16     | 39.2 | 727   | 15      | 41.6 | 712   | 12   | 30.8 | 603   | ns O  | <sup>19</sup>    |
| CAN10393.1 | F778R       | Ribonucleotide reductase (large subunit) | 18     | 27.4 | 723   | 15      | 25.7 | 572   | 13   | 20.6 | 600   | ns O  | <sup>19</sup>    |
| CAN10394.1 | F165R       | pF165R                                   | 12     | 47.3 | 600   | 2       | 15.2 | 131   | 7    | 41.2 | 456   | u O   |                  |
| CAN10396.1 | K205R       | pK205R                                   | 39     | 83.4 | 1959  | 40      | 84.9 | 1997  | 39   | 83.4 | 1842  | u P   | <sup>20</sup>    |
| CAN10397.1 | K78R        | p10                                      | 10     | 60.3 | 557   | 6       | 59   | 192   | 10   | 60.3 | 581   | s P   | <sup>21,22</sup> |
| CAN10399.1 | K145R       | pK145R                                   | 35     | 90.3 | 2174  | 23      | 78.6 | 1220  | 31   | 89   | 1706  | u P   | <sup>23</sup>    |
| CAN10400.1 | K421R       | pK421R                                   | 6      | 14   | 174   | 0       | 0    | 0     | 0    | 0    | 0     | u R   |                  |
| CAN10401.1 | EP1242L     | RNA polymerase subunit 2                 | 18     | 19.3 | 748   | 11      | 12.1 | 418   | 22   | 24.2 | 713   | s P   | <sup>24</sup>    |

| Accession  | Gene    | Description                           | WSL-HP |      |       | HEK 293 |      |       | Vero |      |       | Class | Ref      |
|------------|---------|---------------------------------------|--------|------|-------|---------|------|-------|------|------|-------|-------|----------|
|            |         |                                       | Pep    | SC   | Score | Pep     | SC   | Score | Pep  | SC   | Score |       |          |
| CAN10402.1 | EP84R   | pEP84R                                | 3      | 19   | 164   | 0       | 0    | 0     | 3    | 19   | 123   | ns R  |          |
| CAN10403.1 | EP424R  | FTS J-like methyl transferase domain  | 4      | 17.5 | 218   | 3       | 11.3 | 71    | 0    | 0    | 0     | ns R  | 7        |
| CAN10408.1 | M1249L  | PM1249L                               | 28     | 29.1 | 898   | 6       | 4.9  | 236   | 14   | 15.1 | 472   | u R   | 7        |
| CAN10409.1 | M448R   | PM448R                                | 22     | 42.6 | 1391  | 14      | 39.3 | 764   | 17   | 41.7 | 959   | u R   | 7        |
| CAN10410.1 | C129R   | PC129R                                | 20     | 94.6 | 1192  | 2       | 19.4 | 141   | 21   | 90.7 | 1011  | u R   | 7        |
| CAN10412.1 | C717R   | pC717R                                | 2      | 4.2  | 98    | 0       | 0    | 0     | 0    | 0    | 0     | u R   | 7        |
| CAN10413.1 | C122R   | pC122R                                | 0      | 0    | 0     | 0       | 0    | 0     | 3    | 41   | 101   | u O   |          |
| CAN10414.1 | C257L   | PC257L                                | 11     | 37   | 538   | 0       | 0    | 0     | 8    | 37.4 | 420   | u O   |          |
| CAN10415.1 | C475L   | PolyA polymerase large subunit        | 13     | 27.4 | 432   | 0       | 0    | 0     | 5    | 10.7 | 146   | s O   |          |
| CAN10416.1 | C315R   | TFIIB like                            | 5      | 20   | 274   | 0       | 0    | 0     | 3    | 11.4 | 161   | ns O  |          |
| CAN10417.1 | C147L   | RNA polymerase subunit 6              | 0      | 0    | 0     | 2       | 13.6 | 81    | 2    | 13.6 | 82    | s P   | 25       |
| CAN10420.1 | C962R   | DNA primase                           | 17     | 21.9 | 536   | 5       | 5.8  | 205   | 25   | 28.5 | 920   | ns R  | 26       |
| CAN10422.1 | B962L   | Helicase superfamily II               | 4      | 5.5  | 124   | 0       | 0    | 0     | 4    | 4.9  | 116   | ns R  | 19       |
| CAN10423.1 | B119L   | ERV 1-like/ Sulfhydryl oxidase pb119I | 9      | 47.9 | 450   | 0       | 0    | 0     | 7    | 31.1 | 187   | s P   | 17,27    |
| CAN10424.1 | B318L   | Prenyltransferase                     | 4      | 17.9 | 124   | 0       | 0    | 0     | 0    | 0    | 0     | ns P  | 28,29    |
| CAN10425.1 | B438L   | p49                                   | 8      | 23.5 | 309   | 0       | 0    | 0     | 8    | 21.2 | 211   | s P   | 30       |
| CAN10427.1 | B475L   | pB475L                                | 52     | 75.2 | 3237  | 20      | 39.8 | 783   | 63   | 82.1 | 3597  | u O   |          |
| CAN10428.1 | B354L   | pB354L                                | 5      | 14.1 | 144   | 0       | 0    | 0     | 0    | 0    | 0     | u O   |          |
| CAN10429.1 | B602L   | Chaperone                             | 60     | 61.4 | 3530  | 42      | 52.5 | 1925  | 59   | 55   | 3328  | ns P  | 31       |
| CAN10431.1 | B646L   | p72                                   | 108    | 82.5 | 8084  | 42      | 61   | 2160  | 74   | 71.1 | 4532  | s P   | 32,33    |
| CAN10432.1 | B125R   | pB125R                                | 15     | 69.6 | 627   | 3       | 35.2 | 135   | 6    | 50.4 | 251   | u O   |          |
| CAN10434.1 | B407L   | pB407L                                | 25     | 54.4 | 1380  | 8       | 21.1 | 383   | 11   | 25.5 | 543   | u R   | 7        |
| CAN10435.1 | B175L   | VV VLTF2-like                         | 6      | 25.7 | 204   | 0       | 0    | 0     | 5    | 23.4 | 157   | ns R  | 7        |
| CAN10436.1 | B263R   | pB263R                                | 0      | 0    | 0     | 0       | 0    | 0     | 2    | 9.5  | 79    | u R   | 7        |
| CAN10438.1 | G1340L  | VV A8L-like transcription factor      | 8      | 6.8  | 280   | 0       | 0    | 0     | 5    | 3.9  | 180   | ns R  | 7        |
| CAN10439.1 | G1211R  | DNA polymerase family B               | 6      | 7    | 318   | 11      | 10.7 | 360   | 13   | 14   | 398   | ns R  | 34,35    |
| CAN10440.1 | CP123L  | pCP123L                               | 21     | 59.3 | 1306  | 2       | 22   | 125   | 13   | 56.9 | 557   | u O   |          |
| CAN10441.1 | CP2475L | pp220                                 | 252    | 71.6 | 13744 | 68      | 29.4 | 2702  | 176  | 58.1 | 9029  | s P   | 36-39    |
| CAN10442.1 | CP204L  | p32 (p30)                             | 27     | 65.5 | 2196  | 23      | 65.5 | 1452  | 22   | 67.5 | 1456  | s P   | 40,41    |
| CAN10443.1 | CP530R  | pp62 (pp60)                           | 64     | 77   | 4278  | 24      | 53.2 | 1031  | 58   | 71.7 | 2982  | s P   | 36,39    |
| CAN10444.1 | CP80R   | RNA polymerase subunit 10             | 4      | 43.8 | 141   | 0       | 0    | 0     | 4    | 35   | 129   | s P   |          |
| CAN10445.1 | CP312R  | pCP312R                               | 30     | 61.5 | 2095  | 28      | 73.1 | 1670  | 26   | 61.9 | 1569  | u P   | 23,42    |
| CAN10447.1 | O61R    | p12                                   | 2      | 26.2 | 160   | 0       | 0    | 0     | 0    | 0    | 0     | s P   | 39,43,44 |
| CAN10448.1 | NP1450L | RNA polymerase subunit 1              | 14     | 10.7 | 544   | 9       | 6.6  | 352   | 13   | 11.6 | 468   | s P   | 24       |
| CAN10449.1 | NP419L  | DNA ligase                            | 12     | 28.2 | 427   | 10      | 24.1 | 418   | 11   | 24.6 | 333   | ns R  | 45       |
| CAN10450.1 | NP868R  | Guanylyl transferase                  | 6      | 7.6  | 309   | 2       | 2    | 122   | 4    | 6.2  | 143   | s P   | 46       |
| CAN10451.1 | D250R   | Nudix hydrolase                       | 5      | 20.8 | 121   | 0       | 0    | 0     | 6    | 23.2 | 175   | ns R  | 47-50    |

| Accession  | Gene   | Description                  | WSL-HP |      |       | HEK 293 |      |       | Vero |      |       | Class | Ref      |
|------------|--------|------------------------------|--------|------|-------|---------|------|-------|------|------|-------|-------|----------|
|            |        |                              | Pep    | SC   | Score | Pep     | SC   | Score | Pep  | SC   | Score |       |          |
| CAN10453.1 | D79L   | pD79L                        | 3      | 55.7 | 123   | 0       | 0    | 0     | 4    | 57   | 221   | u O   | 26       |
| CAN10454.1 | D339L  | pD339L                       | 9      | 15.6 | 217   | 6       | 17.4 | 217   | 9    | 28   | 339   | u O   | 48       |
| CAN10455.1 | D1133L | Helicase superfamily II      | 12     | 13.1 | 405   | 2       | 2.3  | 129   | 11   | 12.9 | 394   | ns P  | 24       |
| CAN10456.1 | D117L  | P17                          | 11     | 58.1 | 860   | 9       | 54.7 | 486   | 13   | 64.1 | 651   | s P   | 48,51,52 |
| CAN10457.1 | D205R  | RNA polymerase subunit 5     | 0      | 0    | 0     | 3       | 17.6 | 100   | 2    | 11.2 | 117   | s P   | 48       |
| CAN10458.1 | D345L  | Lambda-like exonuclease      | 7      | 21.7 | 262   | 0       | 0    | 0     | 7    | 17.4 | 150   | ns R  | 53       |
| CAN10459.1 | S183L  | pS183L                       | 3      | 19.1 | 137   | 0       | 0    | 0     | 0    | 0    | 0     | u R   | 53       |
| CAN10460.1 | S273R  | SUMO-1-like protease.        | 6      | 33   | 231   | 0       | 0    | 0     | 6    | 32.2 | 181   | s P   | 54       |
| CAN10461.1 | P1192R | DNA topoisomerase type II    | 4      | 4.4  | 153   | 0       | 0    | 0     | 9    | 10.7 | 298   | ns R  | 54       |
| CAN10462.1 | H359L  | RNA polymerase subunit 3     | 14     | 44.6 | 716   | 8       | 31.5 | 358   | 12   | 35.1 | 567   | s P   | 48,55    |
| CAN10463.1 | H171R  | pH171R                       | 22     | 86   | 1407  | 10      | 67.8 | 555   | 16   | 71.3 | 983   | u R   | 48       |
| CAN10464.1 | H124R  | pH124R                       | 2      | 19.4 | 57    | 0       | 0    | 0     | 2    | 19.4 | 45    | u R   | 7        |
| CAN10465.1 | H339R  | pH339R (j4R)                 | 27     | 58.7 | 1173  | 9       | 22.1 | 289   | 26   | 57.8 | 992   | ns P  | 48       |
| CAN10467.1 | H233R  | pH233R                       | 6      | 27.5 | 227   | 0       | 0    | 0     | 3    | 13.3 | 96    | u O   | 48       |
| CAN10468.1 | H240R  | pH240R                       | 7      | 22.1 | 252   | 0       | 0    | 0     | 4    | 20.8 | 126   | u O   | 48       |
| CAN10469.1 | R298L  | Serine protein kinase        | 4      | 16.8 | 95    | 0       | 0    | 0     | 3    | 12.8 | 75    | s P   | 56       |
| CAN10470.1 | Q706L  | Helicase superfamily II      | 6      | 11.9 | 221   | 4       | 7.9  | 162   | 10   | 16.6 | 428   | ns O  | 57       |
| CAN10473.1 | E184L  | pE184L                       | 31     | 77.7 | 1477  | 20      | 62   | 880   | 22   | 72.3 | 1000  | u O   | 23,48    |
| CAN10474.1 | E183L  | p54 (j13L)                   | 10     | 18   | 533   | 6       | 16.4 | 296   | 10   | 25.7 | 457   | s P   | 58,59    |
| CAN10477.1 | E146L  | pE146L                       | 14     | 65.8 | 849   | 4       | 39.7 | 196   | 10   | 66.4 | 579   | u P   | 48,60    |
| CAN10479.1 | E165R  | dUTPase                      | 14     | 68.5 | 677   | 7       | 53.3 | 442   | 11   | 66.7 | 558   | ns O  | 48       |
| CAN10480.1 | E248R  | E248R (k2R)                  | 2      | 15.3 | 214   | 0       | 0    | 0     | 0    | 0    | 0     | s P   | 48,61    |
| CAN10481.1 | E120R  | p14.5                        | 10     | 62.5 | 897   | 6       | 43.3 | 260   | 7    | 42.5 | 535   | s P   | 62,63    |
| CAN10482.1 | E296R  | AP endonuclease class II     | 9      | 33.1 | 489   | 10      | 33.4 | 415   | 5    | 19.9 | 221   | ns P  | 48       |
| CAN10485.1 | I267L  | pI267L                       | 6      | 23.2 | 186   | 3       | 9.7  | 77    | 6    | 23.2 | 236   | u O   | 48       |
| CAN10486.1 | I226R  | pI226R                       | 9      | 32.3 | 322   | 0       | 0    | 0     | 8    | 27   | 240   | u R   | 48       |
| CAN10487.1 | I243L  | Transcription factor SII     | 13     | 42.8 | 658   | 6       | 24.3 | 253   | 8    | 30.5 | 383   | ns R  | 64       |
| CAN10488.1 | I73R   | pI73R                        | 15     | 97.3 | 1251  | 12      | 100  | 760   | 14   | 100  | 952   | u R   | 64       |
| CAN10489.1 | I329L  | pI329L                       | 23     | 49.5 | 1382  | 0       | 0    | 0     | 7    | 22.5 | 249   | ns R  | 48,64-66 |
| CAN10490.1 | I215L  | Ubiquitin conjugating enzyme | 12     | 40.5 | 532   | 10      | 25.1 | 387   | 25   | 76.3 | 1200  | ns P  | 64,67,68 |
| CAN10491.1 | I177L  | pI177L                       | 2      | 17.5 | 54    | 0       | 0    | 0     | 0    | 0    | 0     | u R   | 64       |
| CAN10492.1 | I196L  | pI196L                       | 2      | 10.2 | 78    | 0       | 0    | 0     | 0    | 0    | 0     | u R   | 64       |
| CAN10493.1 | DP238L | pDP238L                      | 10     | 34.5 | 404   | 8       | 22.3 | 289   | 13   | 42.9 | 629   | u O   |          |
| CAN10506.1 | DP96R  | pDP96R                       | 6      | 66.7 | 300   | 3       | 32.3 | 94    | 8    | 74   | 418   | u O   |          |

9 **Supplementary Figure S1.** Physicochemical properties of ASFV and *Sus scrofa* proteins. The three panels show the distributions of molecular weights (left),  
10 isoelectric points (central) and grand averages of hydropathy (GRAVY, right) of ASFV (triangles) and porcine (circles) proteins. The y-axes represent the  
11 normalized counts of proteins. Note that ASFV proteins (triangles) are, on average, smaller, more basic, and more hydrophobic than porcine proteins (circles).  
12

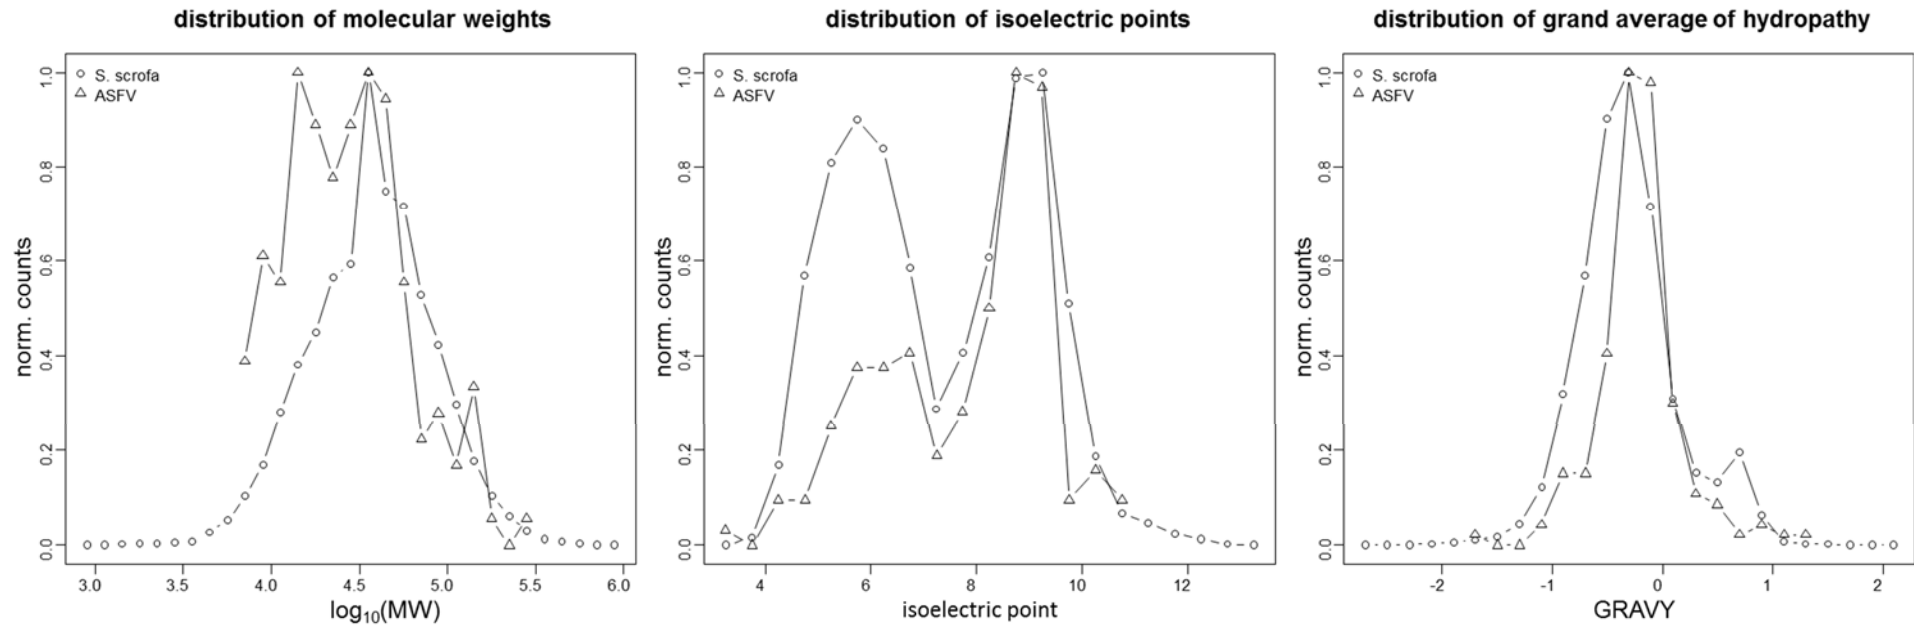

13  
14  
15

16 **Supplementary Figure S2.** Processing of signal peptides of four MGF 110 proteins and pI329L.  
 17 Panel headers A-E indicate the protein name, the predicted sequence region after cleavage of the  
 18 protein N-terminal signal peptide, and the sequence of the identified N-terminal peptide with a dot at  
 19 the proteolytic cleavage site. Identified peptides are mapped to the mature protein sequence as grey  
 20 boxes, the N-terminal peptides are highlighted as green boxes. Small red boxes indicate amino acid  
 21 residues identified by peptide fragmentation. Below the protein sequences the fragment spectra of the  
 22 N-terminal peptides are shown together with the annotated peptide fragment series.

23

24 **A. MGF 110-1L, AA 19-270, NH<sub>2</sub>-YEIEPLER.T**

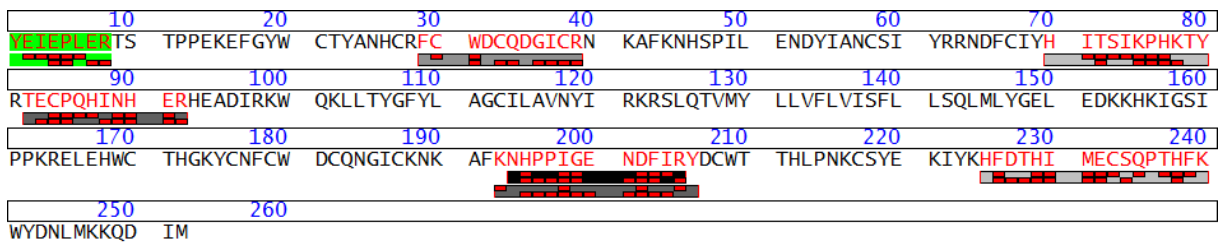

25

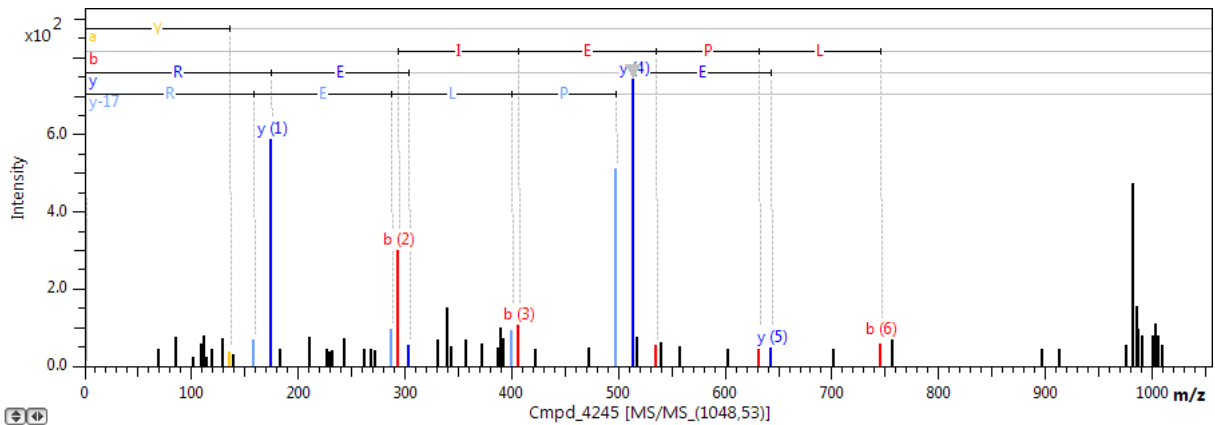

26

27

28 **B. MGF 110-2L, AA 20-104, NH<sub>2</sub>-FSTDNLLEEELR.Y**

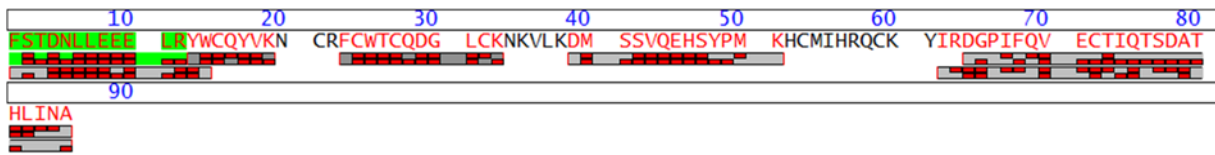

29

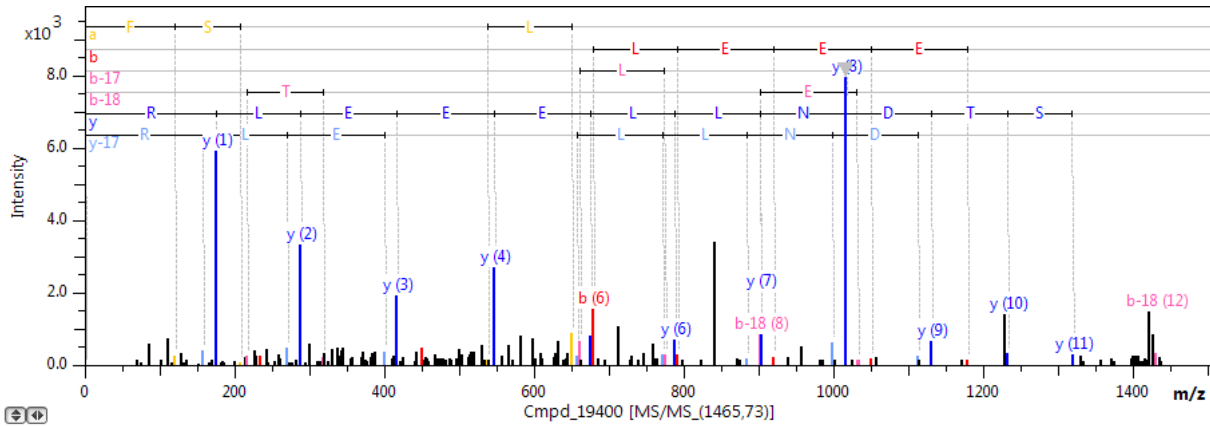

30

31

32 **C. MGF 110-4L, AA 19-124, NH<sub>2</sub>-LPTQAEGLHR.S**

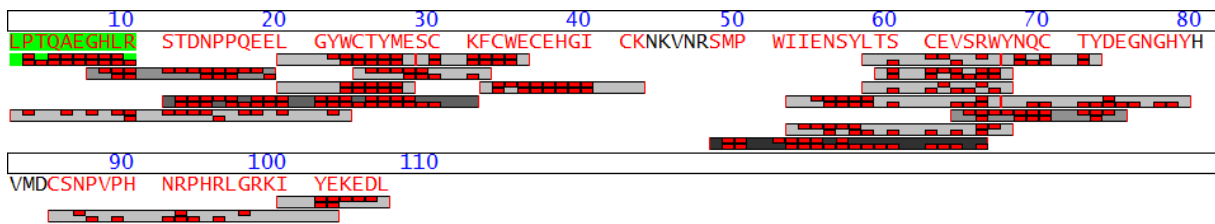

33

34

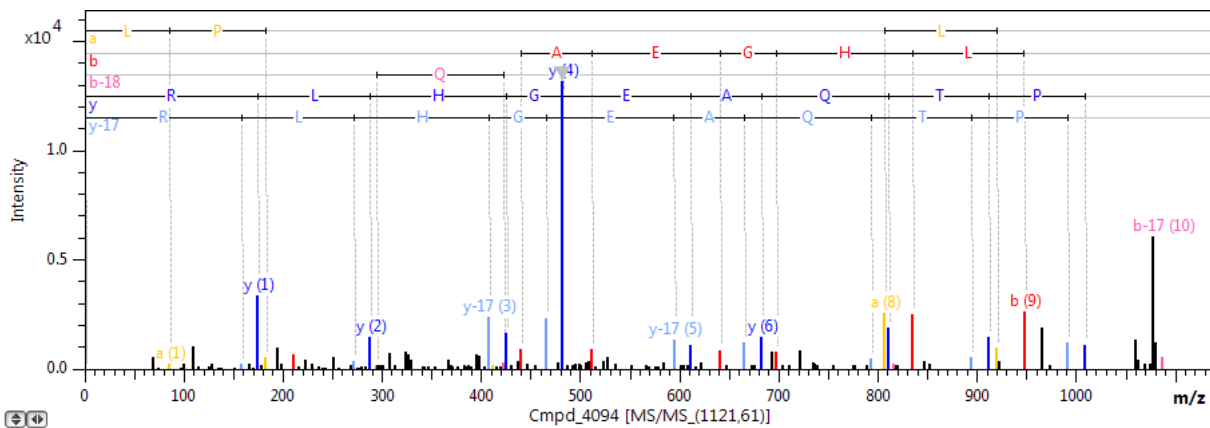

35

36

37

38 **D. MGF 110-5L, AA 19-124, NH<sub>2</sub>-LPTQAGGHLR.S**

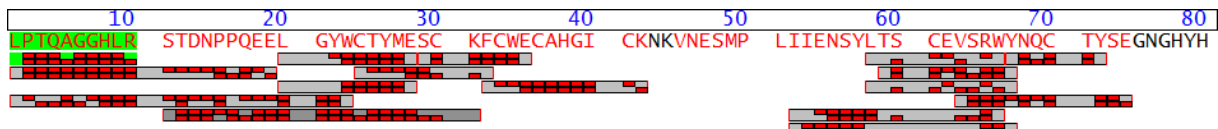

39 **VMDCSDPVPH NRPHRLLMKI YEKEDL**

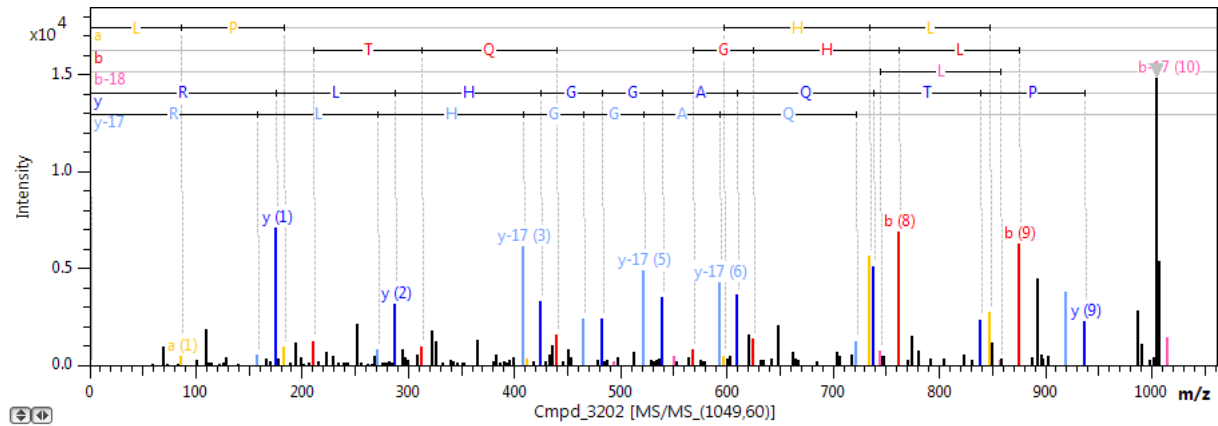

40 ☒☒

41

42 **E. pI329L, AA 17-329, NH<sub>2</sub>-GRIKPQVTCKYFISE.N**

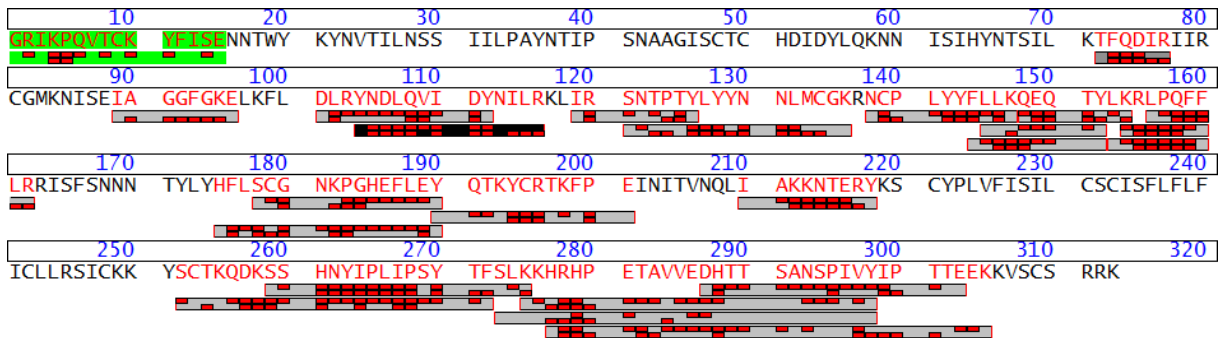

43

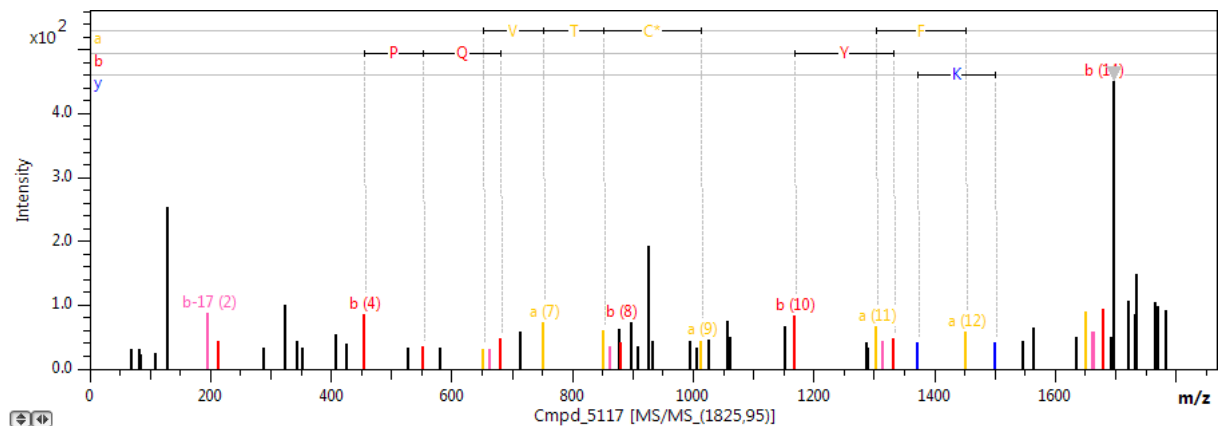

44 ☒☒

45



## References

- 47 1 The UniProt Consortium. UniProt: the universal protein knowledgebase. *Nucleic Acids Res* **45**,  
48 D158-D169, doi:10.1093/nar/gkw1099 (2017).
- 49 2 Dixon, L. K., Chapman, D. A., Netherton, C. L. & Upton, C. African swine fever virus replication  
50 and genomics. *Virus Res* **173**, 3-14, doi:10.1016/j.virusres.2012.10.020 (2013).
- 51 3 Dixon, L. K., Alonso, C., Escribano, J.M., Martins, C., Revilla, Y., Salas, M.L. and Takamatsu, H.  
52 in *Virus Taxonomy Classification and Nomenclature of Viruses Ninth Report of the*  
53 *International Committee on Taxonomy of Viruses Virus Taxonomy Classification and*  
54 *Nomenclature of Viruses Ninth Report of the International Committee on Taxonomy of*  
55 *Viruses* (ed Michael J. Adams Andrew M.Q. King, Eric B. Carstens, and Elliot J. Lefkowitz) 153-  
56 162 (Elsevier Academic Press, 2012).
- 57 4 Yanez, R. J. *et al.* Analysis of the complete nucleotide sequence of African swine fever virus.  
58 *Virology* **208**, 249-278, doi:10.1006/viro.1995.1149 (1995).
- 59 5 Camacho, A. & Vinuela, E. Protein p22 of African swine fever virus: an early structural protein  
60 that is incorporated into the membrane of infected cells. *Virology* **181**, 251-257 (1991).
- 61 6 Vydelingum, S., Baylis, S. A., Bristow, C., Smith, G. L. & Dixon, L. K. Duplicated genes within  
62 the variable right end of the genome of a pathogenic isolate of African swine fever virus. *J*  
63 *Gen Virol* **74 ( Pt 10)**, 2125-2130 (1993).
- 64 7 Jaing, C. *et al.* Gene expression analysis of whole blood RNA from pigs infected with low and  
65 high pathogenic African swine fever viruses. *Sci Rep* **7**, 10115, doi:10.1038/s41598-017-  
66 10186-4 (2017).
- 67 8 Almendral, J. M., Almazan, F., Blasco, R. & Vinuela, E. Multigene families in African swine  
68 fever virus: family 110. *J Virol* **64**, 2064-2072 (1990).
- 69 9 Rouiller, I., Brookes, S. M., Hyatt, A. D., Windsor, M. & Wileman, T. African swine fever virus  
70 is wrapped by the endoplasmic reticulum. *J Virol* **72**, 2373-2387 (1998).
- 71 10 Rodriguez, J. M. *et al.* Multigene families in African swine fever virus: family 505. *J Virol* **68**,  
72 2746-2751 (1994).
- 73 11 Yozawa, T., Kutish, G. F., Afonso, C. L., Lu, Z. & Rock, D. L. Two novel multigene families, 530  
74 and 300, in the terminal variable regions of African swine fever virus genome. *Virology* **202**,  
75 997-1002, doi:10.1006/viro.1994.1426 (1994).
- 76 12 Chacon, M. R., Almazan, F., Nogal, M. L., Vinuela, E. & Rodriguez, J. F. The African swine fever  
77 virus IAP homolog is a late structural polypeptide. *Virology* **214**, 670-674,  
78 doi:10.1006/viro.1995.0083 (1995).
- 79 13 Borca, M. V. *et al.* African swine fever virus structural protein p72 contains a conformational  
80 neutralizing epitope. *Virology* **201**, 413-418, doi:10.1006/viro.1994.1311 (1994).
- 81 14 Borca, M. V. *et al.* A structural DNA binding protein of African swine fever virus with similarity  
82 to bacterial histone-like proteins. *Arch Virol* **141**, 301-313 (1996).
- 83 15 Frouco, G. *et al.* DNA-binding properties of the African swine fever virus pA104R, a histone-  
84 like protein involved in viral replication and transcription. *J Virol*, doi:10.1128/jvi.02498-16  
85 (2017).
- 86 16 Yanez, R. J., Rodriguez, J. M., Rodriguez, J. F., Salas, M. L. & Vinuela, E. African swine fever  
87 virus thymidylate kinase gene: sequence and transcriptional mapping. *J Gen Virol* **74 ( Pt 8)**,  
88 1633-1638 (1993).
- 89 17 Rodriguez, I. *et al.* African swine fever virus pB119L protein is a flavin adenine dinucleotide-  
90 linked sulfhydryl oxidase. *J Virol* **80**, 3157-3166, doi:10.1128/JVI.80.7.3157-3166.2006 (2006).
- 91 18 Alcami, A., Angulo, A. & Vinuela, E. Mapping and sequence of the gene encoding the African  
92 swine fever virion protein of M(r) 11500. *J Gen Virol* **74 ( Pt 11)**, 2317-2324,  
93 doi:10.1099/0022-1317-74-11-2317 (1993).
- 94 19 Bournsnell, M., Shaw, K., Yanez, R. J., Vinuela, E. & Dixon, L. The sequences of the  
95 ribonucleotide reductase genes from African swine fever virus show considerable homology  
96 with those of the orthopoxvirus, vaccinia virus. *Virology* **184**, 411-416 (1991).

97 20 Gutierrez-Castaneda, B., Reis, A. L., Corteyn, A., Parkhouse, R. M. & Kollnberger, S.  
98 Expression, cellular localization and antibody responses of the African swine fever virus  
99 genes B602L and K205R. *Arch Virol* **153**, 2303-2306, doi:10.1007/s00705-008-0246-z (2008).

100 21 Salas, M. L., Salas, J. & Vinuela, E. Phosphorylation of African swine fever virus proteins in  
101 vitro and in vivo. *Biochimie* **70**, 627-635 (1988).

102 22 Munoz, M., Freije, J. M., Salas, M. L., Vinuela, E. & Lopez-Otin, C. Structure and expression in  
103 E. coli of the gene coding for protein p10 of African swine fever virus. *Arch Virol* **130**, 93-107  
104 (1993).

105 23 Kollnberger, S. D., Gutierrez-Castaneda, B., Foster-Cuevas, M., Corteyn, A. & Parkhouse, R. M.  
106 Identification of the principal serological immunodeterminants of African swine fever virus by  
107 screening a virus cDNA library with antibody. *J Gen Virol* **83**, 1331-1342, doi:10.1099/0022-  
108 1317-83-6-1331 (2002).

109 24 Yanez, R. J., Bournnell, M., Nogal, M. L., Yuste, L. & Vinuela, E. African swine fever virus  
110 encodes two genes which share significant homology with the two largest subunits of DNA-  
111 dependent RNA polymerases. *Nucleic Acids Res* **21**, 2423-2427 (1993).

112 25 Lu, Z., Kutish, G. F., Sussman, M. D. & Rock, D. L. An African swine fever virus gene with a  
113 similarity to eukaryotic RNA polymerase subunit 6. *Nucleic Acids Res* **21**, 2940 (1993).

114 26 Yanez, R. J., Rodriguez, J. M., Bournnell, M., Rodriguez, J. F. & Vinuela, E. Two putative African  
115 swine fever virus helicases similar to yeast 'DEAH' pre-mRNA processing proteins and  
116 vaccinia virus ATPases D11L and D6R. *Gene* **134**, 161-174 (1993).

117 27 O'Donnell, V. *et al.* African Swine Fever Virus Georgia 2007 with a Deletion of Virulence-  
118 Associated Gene 9GL (B119L), when Administered at Low Doses, Leads to Virus Attenuation  
119 in Swine and Induces an Effective Protection against Homologous Challenge. *J Virol* **89**, 8556-  
120 8566, doi:10.1128/jvi.00969-15 (2015).

121 28 Alejo, A., Andres, G., Vinuela, E. & Salas, M. L. The African swine fever virus prenyltransferase  
122 is an integral membrane trans-geranylgeranyl-diphosphate synthase. *J Biol Chem* **274**, 18033-  
123 18039 (1999).

124 29 Alejo, A., Yanez, R. J., Rodriguez, J. M., Vinuela, E. & Salas, M. L. African swine fever virus  
125 trans-prenyltransferase. *J Biol Chem* **272**, 9417-9423 (1997).

126 30 Epifano, C., Krijnse-Locker, J., Salas, M. L., Rodriguez, J. M. & Salas, J. The African swine fever  
127 virus nonstructural protein pB602L is required for formation of the icosahedral capsid of the  
128 virus particle. *J Virol* **80**, 12260-12270, doi:10.1128/JVI.01323-06 (2006).

129 31 Cobbold, C., Windsor, M. & Wileman, T. A virally encoded chaperone specialized for folding  
130 of the major capsid protein of African swine fever virus. *J Virol* **75**, 7221-7229,  
131 doi:10.1128/jvi.75.16.7221-7229.2001 (2001).

132 32 Cistue, C. & Tabares, E. Expression in vivo and in vitro of the major structural protein (VP73)  
133 of African swine fever virus. *Arch Virol* **123**, 111-124 (1992).

134 33 Garcia-Escudero, R., Andres, G., Almazan, F. & Vinuela, E. Inducible gene expression from  
135 African swine fever virus recombinants: analysis of the major capsid protein p72. *J Virol* **72**,  
136 3185-3195 (1998).

137 34 Rodriguez, J. M., Yanez, R. J., Rodriguez, J. F., Vinuela, E. & Salas, M. L. The DNA polymerase-  
138 encoding gene of African swine fever virus: sequence and transcriptional analysis. *Gene* **136**,  
139 103-110 (1993).

140 35 Martins, A., Ribeiro, G., Marques, M. I. & Costa, J. V. Genetic identification and nucleotide  
141 sequence of the DNA polymerase gene of African swine fever virus. *Nucleic Acids Res* **22**,  
142 208-213 (1994).

143 36 Simon-Mateo, C., Andres, G., Almazan, F. & Vinuela, E. Proteolytic processing in African swine  
144 fever virus: evidence for a new structural polyprotein, pp62. *J Virol* **71**, 5799-5804 (1997).

145 37 Simon-Mateo, C., Andres, G. & Vinuela, E. Polyprotein processing in African swine fever virus:  
146 a novel gene expression strategy for a DNA virus. *EMBO J* **12**, 2977-2987 (1993).

147 38 Andres, G., Simon-Mateo, C. & Vinuela, E. Assembly of African swine fever virus: role of  
148 polyprotein pp220. *J Virol* **71**, 2331-2341 (1997).

149 39 Andres, G., Alejo, A., Salas, J. & Salas, M. L. African swine fever virus polyproteins pp220 and  
150 pp62 assemble into the core shell. *J Virol* **76**, 12473-12482 (2002).

151 40 Afonso, C. L. *et al.* Characterization of p30, a highly antigenic membrane and secreted  
152 protein of African swine fever virus. *Virology* **189**, 368-373 (1992).

153 41 Prados, F. J., Vinuela, E. & Alcami, A. Sequence and characterization of the major early  
154 phosphoprotein p32 of African swine fever virus. *J Virol* **67**, 2475-2485 (1993).

155 42 Reis, A. L., Parkhouse, R. M., Penedos, A. R., Martins, C. & Leitao, A. Systematic analysis of  
156 longitudinal serological responses of pigs infected experimentally with African swine fever  
157 virus. *J Gen Virol* **88**, 2426-2434, doi:10.1099/vir.0.82857-0 (2007).

158 43 Carrascosa, A. L., Saastre, I., Gonzalez, P. & Vinuela, E. Localization of the African swine fever  
159 virus attachment protein P12 in the virus particle by immunoelectron microscopy. *Virology*  
160 **193**, 460-465, doi:10.1006/viro.1993.1146 (1993).

161 44 Salas, M. L. & Andres, G. African swine fever virus morphogenesis. *Virus Res* **173**, 29-41,  
162 doi:10.1016/j.virusres.2012.09.016 (2013).

163 45 Yanez, R. J. & Vinuela, E. African swine fever virus encodes a DNA ligase. *Virology* **193**, 531-  
164 536, doi:10.1006/viro.1993.1161 (1993).

165 46 Pena, L., Yanez, R. J., Revilla, Y., Vinuela, E. & Salas, M. L. African swine fever virus  
166 guanylyltransferase. *Virology* **193**, 319-328, doi:10.1006/viro.1993.1128 (1993).

167 47 Koonin, E. V. & Senkevich, T. G. Vaccinia virus encodes four putative DNA and/or RNA  
168 helicases distantly related to each other. *J Gen Virol* **73 ( Pt 4)**, 989-993, doi:10.1099/0022-  
169 1317-73-4-989 (1992).

170 48 Dixon, L. K. *et al.* Nucleotide sequence of a 55 kbp region from the right end of the genome  
171 of a pathogenic African swine fever virus isolate (Malawi LIL20/1). *J Gen Virol* **75 ( Pt 7)**, 1655-  
172 1684, doi:10.1099/0022-1317-75-7-1655 (1994).

173 49 Cartwright, J. L. *et al.* The g5R (D250) gene of African swine fever virus encodes a Nudix  
174 hydrolase that preferentially degrades diphosphoinositol polyphosphates. *J Virol* **76**, 1415-  
175 1421 (2002).

176 50 Quintas, A. *et al.* Characterization of the African swine fever virus decapping enzyme during  
177 infection. *J Virol*, doi:10.1128/jvi.00990-17 (2017).

178 51 Simon-Mateo, C., Freije, J. M., Andres, G., Lopez-Otin, C. & Vinuela, E. Mapping and sequence  
179 of the gene encoding protein p17, a major African swine fever virus structural protein.  
180 *Virology* **206**, 1140-1144 (1995).

181 52 Suarez, C., Gutierrez-Berzal, J., Andres, G., Salas, M. L. & Rodriguez, J. M. African swine fever  
182 virus protein p17 is essential for the progression of viral membrane precursors toward  
183 icosahedral intermediates. *J Virol* **84**, 7484-7499, doi:10.1128/JVI.00600-10 (2010).

184 53 Goatley, L. C. & Dixon, L. K. Processing and localization of the african swine fever virus CD2v  
185 transmembrane protein. *J Virol* **85**, 3294-3305, doi:10.1128/JVI.01994-10 (2011).

186 54 Garcia-Beato, R. *et al.* A gene homologous to topoisomerase II in African swine fever virus.  
187 *Virology* **188**, 938-947 (1992).

188 55 Goatley, L. C. *et al.* The African swine fever virus protein j4R binds to the alpha chain of  
189 nascent polypeptide-associated complex. *J Virol* **76**, 9991-9999 (2002).

190 56 Baylis, S. A., Banham, A. H., Vydellingum, S., Dixon, L. K. & Smith, G. L. African swine fever  
191 virus encodes a serine protein kinase which is packaged into virions. *J Virol* **67**, 4549-4556  
192 (1993).

193 57 Freije, J. M., Lain, S., Vinuela, E. & Lopez-Otin, C. Nucleotide sequence of a nucleoside  
194 triphosphate phosphohydrolase gene from African swine fever virus. *Virus Res* **30**, 63-72  
195 (1993).

196 58 Rodriguez, F. *et al.* Characterization and molecular basis of heterogeneity of the African  
197 swine fever virus envelope protein p54. *J Virol* **68**, 7244-7252 (1994).

198 59 Rodriguez, J. M., Garcia-Escudero, R., Salas, M. L. & Andres, G. African swine fever virus  
199 structural protein p54 is essential for the recruitment of envelope precursors to assembly  
200 sites. *J Virol* **78**, 4299-1313 (2004).

201 60 Oliveros, M. *et al.* African swine fever virus dUTPase is a highly specific enzyme required for  
202 efficient replication in swine macrophages. *J Virol* **73**, 8934-8943 (1999).

203 61 Rodriguez, I., Nogal, M. L., Redrejo-Rodriguez, M., Bustos, M. J. & Salas, M. L. The African  
204 swine fever virus virion membrane protein pE248R is required for virus infectivity and an  
205 early postentry event. *J Virol* **83**, 12290-12300, doi:10.1128/JVI.01333-09 (2009).

206 62 Martinez-Pomares, L., Simon-Mateo, C., Lopez-Otin, C. & Vinuela, E. Characterization of the  
207 African swine fever virus structural protein p14.5: a DNA binding protein. *Virology* **229**, 201-  
208 211, doi:10.1006/viro.1996.8434 (1997).

209 63 Andres, G., Garcia-Escudero, R., Vinuela, E., Salas, M. L. & Rodriguez, J. M. African swine fever  
210 virus structural protein pE120R is essential for virus transport from assembly sites to plasma  
211 membrane but not for infectivity. *J Virol* **75**, 6758-6768, doi:10.1128/JVI.75.15.6758-  
212 6768.2001 (2001).

213 64 Rodriguez, J. M., Salas, M. L. & Vinuela, E. Genes homologous to ubiquitin-conjugating  
214 proteins and eukaryotic transcription factor SII in African swine fever virus. *Virology* **186**, 40-  
215 52 (1992).

216 65 de Oliveira, V. L. *et al.* A novel TLR3 inhibitor encoded by African swine fever virus (ASFV).  
217 *Arch Virol* **156**, 597-609, doi:10.1007/s00705-010-0894-7 (2011).

218 66 Henriques, E. S. *et al.* Modeling of the Toll-like receptor 3 and a putative Toll-like receptor 3  
219 antagonist encoded by the African swine fever virus. *Protein science : a publication of the*  
220 *Protein Society* **20**, 247-255, doi:10.1002/pro.554 (2011).

221 67 Hingamp, P. M., Arnold, J. E., Mayer, R. J. & Dixon, L. K. A ubiquitin conjugating enzyme  
222 encoded by African swine fever virus. *EMBO J* **11**, 361-366 (1992).

223 68 Freitas, F. B., Frouco, G., Martins, C. & Ferreira, F. African swine fever virus encodes for an  
224 E2-ubiquitin conjugating enzyme that is mono- and di-ubiquitinated and required for viral  
225 replication cycle. *Sci Rep* **8**, 3471, doi:10.1038/s41598-018-21872-2 (2018).

226

227

1 Supplementary information to Figure 2

2 The following scans show the uncropped immunoblots used in Figure 2. All blots were processed as described in the Methods part and exposed for 8 minutes.

p30 – HEK 293

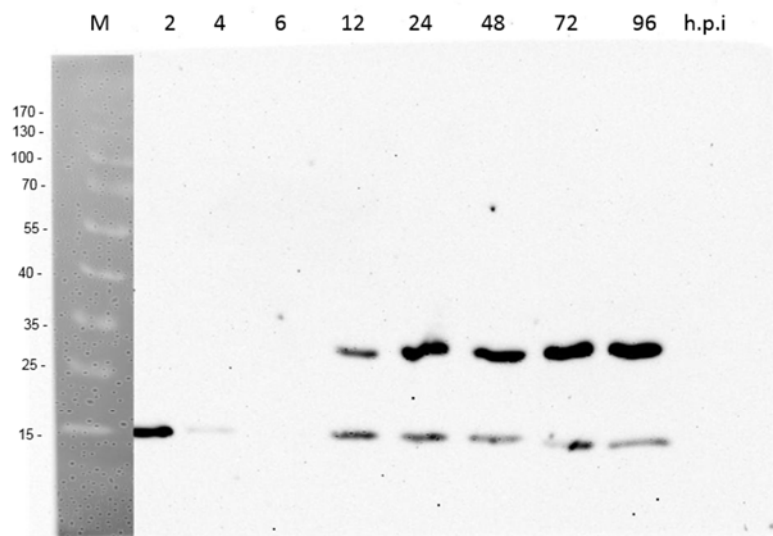

p30 – Vero

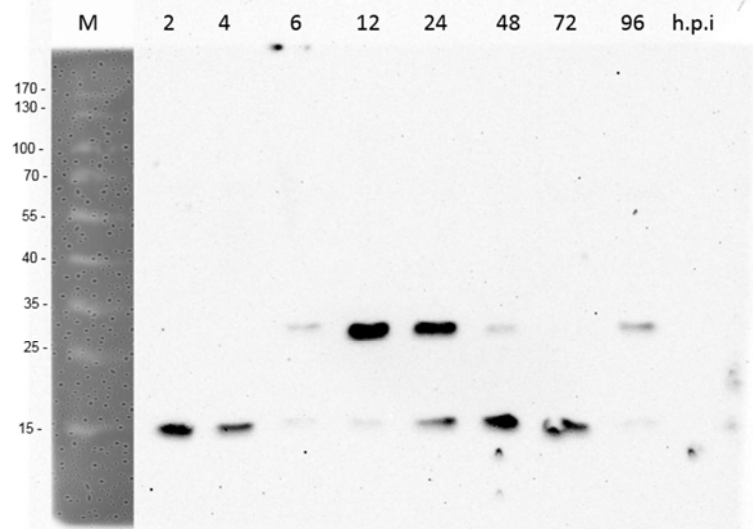

p72 – WSL-HP

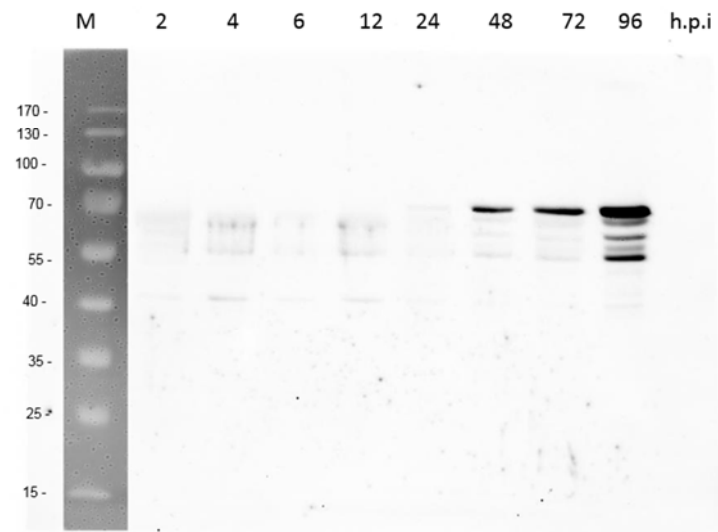

p30 – WSL-HP

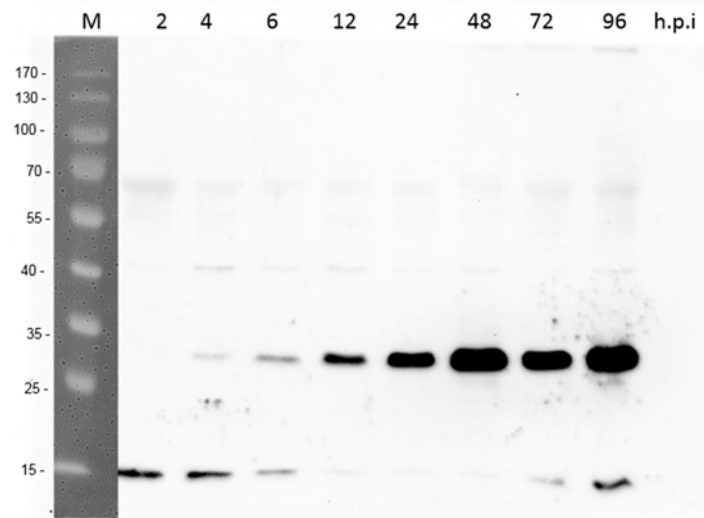

p72 - Vero

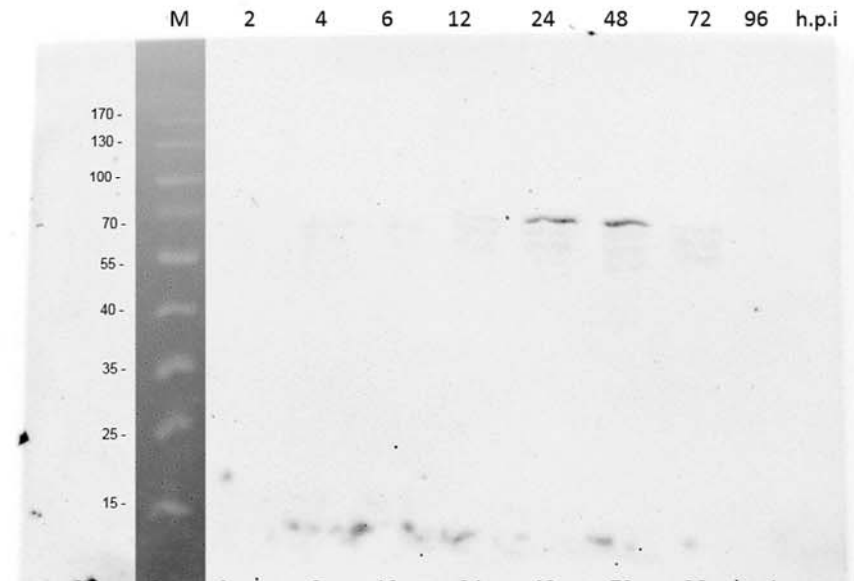

p72 - HEK 293

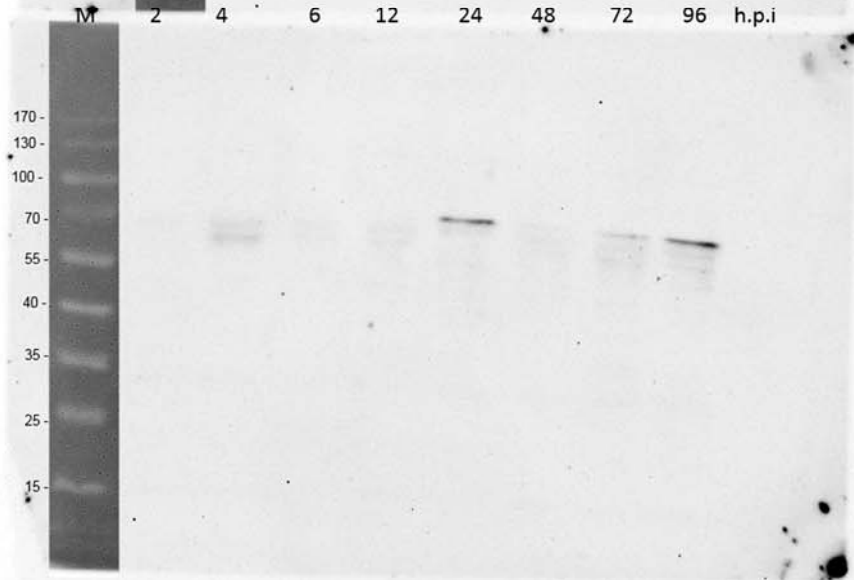

Supplement: 41598_2018_32985_MOESM1_ESM.pdf [file 41598_2018_32985_MOESM1_ESM.pdf]
